# Supplementary material for: A Systematic Review of Metabolomic Biomarkers for the Intake of Sugar-Sweetened and Low-Calorie Sweetened Beverages
Source: MDPI journal article supplement (doi:10.3390/metabo11080546), 2021-08-19
Supplement: s1 [file s1]

**Table S1: Combined quality assessment using NUTRIGRADE and BIOCROSS tools for evaluation of observational studies and biomarkers in human research**

| Study                  | Evaluation of the study             |                         |                            |                           |                    | Evaluation of Biomarker assessment and reporting |                              |                                | Total rating*<br>(Max. 14.5 points) |
|------------------------|-------------------------------------|-------------------------|----------------------------|---------------------------|--------------------|--------------------------------------------------|------------------------------|--------------------------------|-------------------------------------|
|                        | Risk of bias, study quality (0-1.5) | Study limitations (0-2) | Statistical Analysis (0-2) | Data interpretation (0-2) | Funding bias (0-1) | Specimen & assay methods (0-2)                   | Laboratory measurement (0-2) | Biomarker data modelling (0-2) |                                     |
| Choy et al. 2013       | 1.5                                 | 2.0                     | 1.0                        | 2.0                       | 1.0                | 2.0                                              | 1.0                          | 1.0                            | 11.5                                |
| Davy et al. 2011,      | 0.5                                 | 1.0                     | 0.5                        | 2.0                       | 1.0                | 2.0                                              | 1.0                          | 1.0                            | 9.0                                 |
| Hedrick et al. 2016    | 1.5                                 | 1.0                     | 1.0                        | 2.0                       | 1.0                | 2.0                                              | 1.0                          | 1.0                            | 10.5                                |
| Nash et al. 2014       | 1.5                                 | 2.0                     | 1.0                        | 2.0                       | 1.0                | 2.0                                              | 1.0                          | 1.0                            | 11.5                                |
| MacDougall et al. 2018 | 1.5                                 | 2.0                     | 1.0                        | 2.0                       | 1.0                | 2.0                                              | 1.0                          | 1.0                            | 11.5                                |
| Gibbons et al. 2015    | 1.5                                 | 1.0                     | 1.0                        | 2.0                       | 1.0                | 2.0                                              | 1.0                          | 2.0                            | 11.5                                |
| Perng et al. 2019      | 1.5                                 | 2.0                     | 2.0                        | 2.0                       | 1.0                | 2.0                                              | 1.0                          | 2.0                            | 12.5                                |
| Valenzuela et al. 2018 | 1.0                                 | 1.0                     | 1.0                        | 2.0                       | 1.0                | 2.0                                              | 1.0                          | 1.0                            | 10.0                                |
| Logue et al. 2020      | 1.0                                 | 1.0                     | 1.0                        | 2.0                       | 1.0                | 2.0                                              | 1.0                          | 1.0                            | 10.0                                |

**Table S2: Combined quality assessment using NUTRIGRADE and BIOCROSS tools for evaluation of controlled intervention studies and biomarkers in human research**

| Study                 | Evaluation of the study           |                 |                    |                       | Evaluation of Biomarker assessment and reporting |                              |                                | Total Rating*<br>(Max. 13 points) |
|-----------------------|-----------------------------------|-----------------|--------------------|-----------------------|--------------------------------------------------|------------------------------|--------------------------------|-----------------------------------|
|                       | Risk of bias, study quality (0-3) | Precision (0-1) | Funding bias (0-1) | Study design (0 or 2) | Specimen & methods (0-2)                         | Laboratory measurement (0-2) | Biomarker data modelling (0-2) |                                   |
| Davy et al. 2017      | 1.5                               | 0               | 1.0                | 2.0                   | 2.0                                              | 1.0                          | 1.0                            | 8.5                               |
| Fakhouri et al. 2014  | 2.0                               | 0               | 1.0                | 2.0                   | 2.0                                              | 1.0                          | 1.0                            | 9.0                               |
| Votruba et al. 2019   | 2.5                               | 0               | 1.0                | 2.0                   | 2.0                                              | 1.0                          | 1.0                            | 9.5                               |
| Liu et al. 2018       | 1.5                               | 0               | 1.0                | 2.0                   | 2.0                                              | 1.0                          | 1.0                            | 8.5                               |
| Yun et al. 2018       | 0.5                               | 0               | 1.0                | 2.0                   | 2.0                                              | 1.0                          | 1.0                            | 7.5                               |
| Yun et al. 2020       | 0.5                               | 0               | 1.0                | 2.0                   | 2.0                                              | 1.0                          | 1.0                            | 7.5                               |
| Logue et al. 2017     | 1.5                               | 0               | 1.0                | 2.0                   | 2.0                                              | 1.0                          | 1.0                            | 8.5                               |
| Sylvetsky et al. 2017 | 1.0                               | 0               | 1.0                | 2.0                   | 2.0                                              | 1.0                          | 1.0                            | 8.0                               |

For both Table S1 and S2: \*Scores of 0–5 were considered low quality, 5–10 moderate quality and scores ≥ 10 points were considered high quality.
